# Supplementary material
Source: publisher figshare collection journal article supplement (https://karger.figshare.com/articles/dataset/_/23530479)
Supplement: Supplementary file 1 [file 1]

**Table S2.** Gestational age of TOP sorted by type of CHD compared between Group 1 and 2

|  | *Group 1* | | *Group 2* | | *p-value* |
| --- | --- | --- | --- | --- | --- |
| *Type of isolated severe CHD* | *First-and second trimester scan* | | *Second-trimester scan* | |  |
|  | n | GA at TOP | n | GA at TOP |  |
| 1. Aortic arch anomalies | 1 | 23+6 | 2 | 21+2 (21+3 – 22+2) | 0.667 |
| 2. Complex defects with atrial isomerism | 5 | 18+0 (17+0 – 21+4) | 0 | NA | NA |
| 3. Conotruncal anomalies | 9 | 22+6 (21+0 – 23+1) | 4 | 22+1 (21+1 – 22+2) | 0.414 |
| 4. Hypoplastic left heart syndrome | 12 | 21+3 (15+5 – 22+0) | 6 | 21+6 (21+1 – 23+1) | 0.291 |
| 5. Hypoplastic right heart syndrome | 1 | 23+6 | 0 | NA | NA |
| 6. Other univentricular heart defects | 11 | 21+1 (14+0 – 22+6) | 4 | 22+2 (21+5 – 23+2) | 0.177 |
| 7. Septal defects | 4 | 15+0 (13+2 – 21+4) | 0 | NA | NA |
| 8. Valvular anomalies | 5 | 19+0 (14+2 – 22+6) | 2 | 22+2 (21+3 – 22+2) | 0.381 |
| 9. Venous return anomalies | 0 | NA | 0 | NA | NA |
| Total | 48 | 21+3 (16+6 – 22+6) | 18 | 22+1 (21+2 – 22+4) | 0.121 |

Data are given as median (IQR). GA, gestational age; TOP, termination of pregnancy; NA, not applicable.
